# Supplementary material for: Predictive Models for Weekly Cattle Mortality after Arrival at a Feeding Location Using Records, Weather, and Transport Data at Time of Purchase
Source: MDPI journal article supplement (doi:10.3390/pathogens11040473), 2022-04-15
Supplement: s1 [file s1]

**Supplementary Table S1: Description of predictors considered in random forest models predicting all-cause mortality among purchase groups of feedlot cattle**

| Predictor                       | Description                                                                             | Coding                                                                                                                                                                                        |
|---------------------------------|-----------------------------------------------------------------------------------------|-----------------------------------------------------------------------------------------------------------------------------------------------------------------------------------------------|
| Age                             | Age of purchase group                                                                   | 1 = Calf and mixed, 2 = Yearling                                                                                                                                                              |
| Weaned status                   | Weaned status of purchase group                                                         | 1 = Mixed and unweaned, 2 = Weaned                                                                                                                                                            |
| Sex                             | Sex of purchase group                                                                   | 1 = Female, 2 = Male                                                                                                                                                                          |
| Origin                          | Geographic region where purchased                                                       | 1= Canada or north US, 2= South or mixed                                                                                                                                                      |
| Nationality                     | Country where purchased                                                                 | 1 = Canada, 2 = US                                                                                                                                                                            |
| Average purchase weight         | Average purchase weight of purchase group                                               | Continuous                                                                                                                                                                                    |
| Month                           | Month purchased                                                                         | 1 = January, 2 = February, ... 12 = December                                                                                                                                                  |
| Day of week                     | Day of week purchased                                                                   | 1= Monday, 2= Tuesday,... 6 = Saturday/Sunday                                                                                                                                                 |
| Week of month                   | Week of month purchased                                                                 | 1 = Days 1-7, 2 = Days 8-14, 3 = 15-21, 4 = Day 22 until end of month                                                                                                                         |
| Season                          | Season when purchased                                                                   | 1= Spring (March, April, May), 2 = Summer (June, July, August), 3 = Fall (September, October, November), 4= Winter (December, January, February)                                              |
| State                           | State where purchased, states with small sample size grouped together based on location | 1 = CO, 2 = FL, GA, AL, MS, SC, 3 = ID, NV, OR, UT, CA, WY, MT, 4 = IL, OH, WI, 5 = IA, 6= KS, 7 = KY, 8 = MN, 9 = MS, AR, 10 = NE, 11 = ND, 12 = OK, TX, 13 = SD, 14 = TN, 15 = N/A (Canada) |
| Source                          | Source where purchased                                                                  | 1= Auction and mixed, 2=contracted                                                                                                                                                            |
| Shipping distance               | Distance from purchase location to backgrounding/feedlot location                       | Continuous                                                                                                                                                                                    |
| Head                            | Number of cattle in purchase group                                                      | Continuous                                                                                                                                                                                    |
| Relative humidity               | Humidity on purchase day                                                                | Continuous                                                                                                                                                                                    |
| Windspeed                       | Windspeed on purchase day                                                               | Continuous                                                                                                                                                                                    |
| Wind gust                       | Speed of fastest wind gust on purchase day                                              | Continuous                                                                                                                                                                                    |
| Wind bearing                    | The direction that the wind is coming from in degrees on purchase day                   | Continuous                                                                                                                                                                                    |
| Maximum temperature             | Maximum temperature on purchase day                                                     | Continuous                                                                                                                                                                                    |
| Minimum temperature             | Maximum temperature on purchase day                                                     | Continuous                                                                                                                                                                                    |
| Minimum apparent temperature    | Minimum "feels like" temperature on purchase day                                        | Continuous                                                                                                                                                                                    |
| Maximum apparent temperature    | Maximum "feels like" temperature on purchase day                                        | Continuous                                                                                                                                                                                    |
| Maximum precipitation intensity | Maximum precipitation intensity on purchase day                                         | Continuous                                                                                                                                                                                    |
| Precipitation intensity         | The intensity (water per hour) of precipitation                                         | Continuous                                                                                                                                                                                    |
| Precipitation                   | Precipitation on purchase day                                                           | 0 = There was not precipitation, 1= There was precipitation                                                                                                                                   |
| Precipitation type              | Type of precipitation on purchase day                                                   | 1 = Rain, 2 = Snow, 3 = Sleet                                                                                                                                                                 |
| Precipitation accumulation      | The amount of snowfall accumulation expected to occur in inches on purchase day         | Continuous                                                                                                                                                                                    |
| Ozone                           | The columnar density of total atmospheric ozone on purchase day                         | Continuous                                                                                                                                                                                    |
| Visibility                      | The average visibility in distance on purchase day                                      | Continuous                                                                                                                                                                                    |

|              |                                                                                          |                                                                                                   |
|--------------|------------------------------------------------------------------------------------------|---------------------------------------------------------------------------------------------------|
| Weather icon | Text icon of weather on purchase day                                                     | 1 = Clear day, 2 = Cloudy, 3 = Fog, 4 = Partly cloudy day, 5= Rain, 6 = Sleet, 7 = Snow, 8 = Wind |
| Dew point    | The atmospheric temperature below which water droplets begin to condense on purchase day | Continuous                                                                                        |
| Pressure     | The sea-level air pressure on purchase day                                               | Continuous                                                                                        |
| UV index     | UV radiation levels on purchase day                                                      | Discrete scale 0-11                                                                               |
